# Supplementary material for: Historical nitrogen fertilizers use in China from 1952 to 2018
Source: Copernicus journal article supplement (doi:10.5194/essd-2022-263), 2022-08-22

1 **Supporting information**

2 **Historical nitrogen fertilizers use in China from 1952 to 2018**

3 Zhen Yu<sup>1,2</sup>, Jing Liu<sup>2</sup>, Giri Raj Kattel<sup>3,4,5</sup>

4 <sup>1</sup> Collaborative Innovation Center on Forecast and Evaluation of Meteorological Disasters (CIC-FEMD),  
5 Nanjing University of Information Science & Technology, Nanjing, China 210044

6 <sup>2</sup> Institute of Ecology, School of Applied Meteorology, Nanjing University of Information Science and  
7 Technology, Nanjing, 210044, China

8 <sup>3</sup> School of Geographical Sciences, Nanjing University of Information Science & Technology, Nanjing, China

9 <sup>4</sup> Department of Infrastructure Engineering, University of Melbourne, Parkville, Melbourne, Australia

10 <sup>5</sup> Department of Hydraulic Engineering, Tsinghua University, Beijing, China

11

12

13 **Fig. S1** Supplementary information showing the datasets used for reconstruction and

14 spatialization of nitrogen fertilizers use in China.

15 **Fig. S2** Supplementary information showing nitrogen fertilizers use rate in major crop types

16 from 1952 to 2018 using data of nearby provinces for gap-filling.

17 **Fig. S3** Supplementary information showing nitrogen fertilizers use rate in major crop types

18 from 1952 to 2018 using data of national averages for gap-filling.

19 **Fig. S4** Supplementary information showing total nitrogen fertilizers input for each major crop

20 types from 1952 to 2018 using data of nearby provinces for gap-filling.

21 **Fig. S5** Supplementary information showing total nitrogen fertilizers input for each major crop

22 types from 1952 to 2018 using data of national averages for gap-filling.

23

24 **Fig. S1** Supplementary information showing the datasets used for reconstruction and  
25 spatialization of nitrogen fertilizers use in China. (Yu's cropland: the cropland data reconstructed  
26 in Yu et al., (2021); Liu' data: crop rotation maps from Liu et al., (2018); CAY: Chinese  
27 Agricultural Yearbook; FAO: FAO statistical database obtained from <http://faostat.fao.org>; CSY:  
28 Chinese Statistical Yearbook).

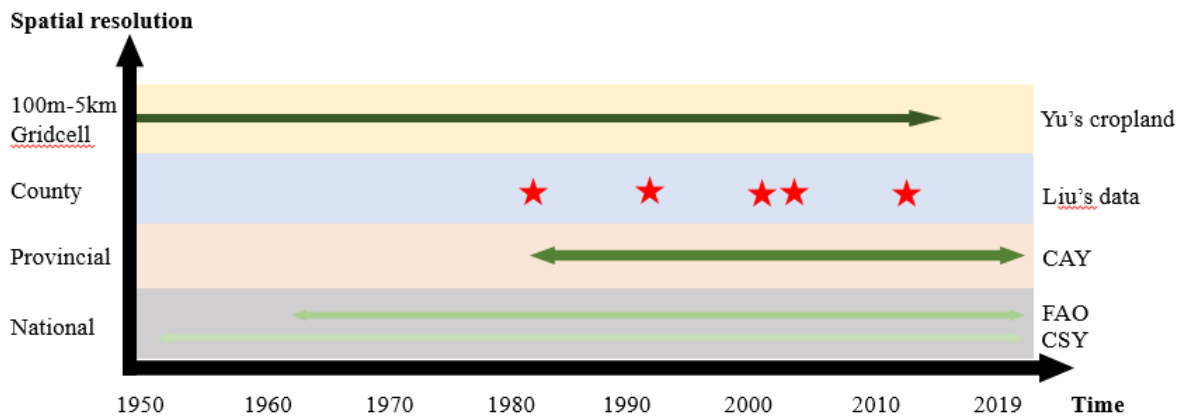

29

30

31 **Fig. S2** Supplementary information showing nitrogen fertilizers use rates in major crop types in  
 32 China from 1952 to 2018 using data of nearby provinces for gap-filling. (panel a: N fertilizer rate  
 33 of vegetable is the average of all other crops (except ‘Other crops’), and compound fertilizers  
 34 contains 16% of N; panel b: N fertilizers use rates of vegetable is the average of all other crops  
 35 (except ‘Other crops’), and compound fertilizer contains 33% of N; panel c: N fertilizer rate of  
 36 vegetable is 3.3 times of the average rate of all other crops (except ‘Other crops’), and compound  
 37 fertilizer contains 16% of N; panel b: N fertilizer rate of vegetable is 3.3 times of the average rate  
 38 of all other crops (except ‘Other crops’), and compound fertilizer contains 33% of N; Unit: g N  
 39  $\text{m}^{-2} \text{yr}^{-1}$ )

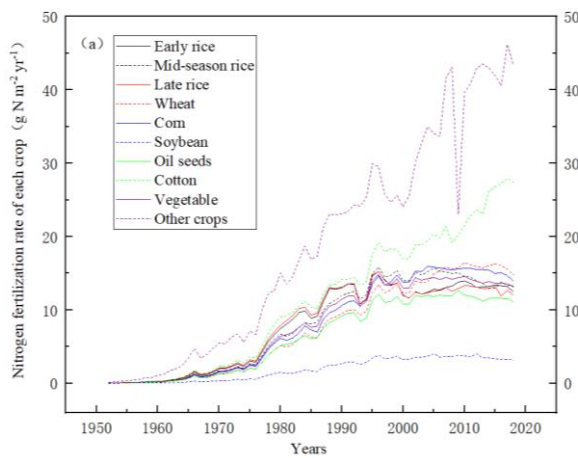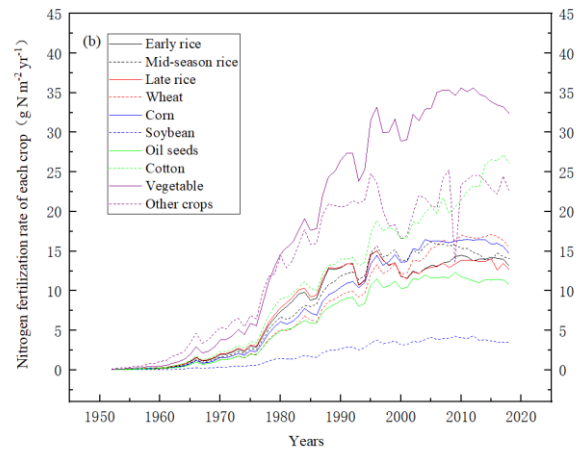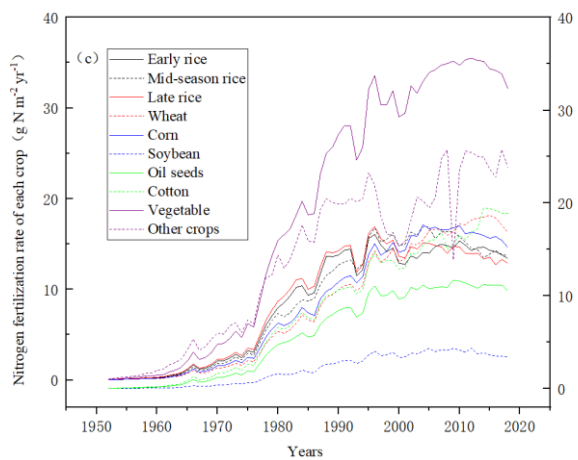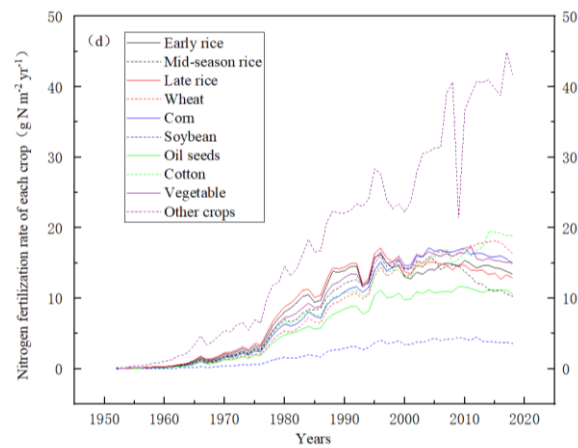

40

41

42 **Fig. S3** Supplementary information showing nitrogen fertilizers use rates in major crop types in  
 43 China from 1952 to 2018 using data of national averages for gap-filling. (panel a: N fertilizers  
 44 use rate of vegetable is the average of all other crops (except ‘Other crops’), and compound  
 45 fertilizer contains 16% of N; panel b: N fertilizer rate of vegetable is the average of all other  
 46 crops (except ‘Other crops’), and compound fertilizer contains 33% of N; panel c: N fertilizers  
 47 use rates of vegetable is 3.3 times of the average rate of all other crops (except ‘Other crops’),  
 48 and compound fertilizer contains 16% of N; panel b: N fertilizers use rate of vegetable is 3.3  
 49 times of the average rate of all other crops (except ‘Other crops’), and compound fertilizer  
 50 contains 33% of N; Unit:  $\text{g N m}^{-2} \text{yr}^{-1}$ )

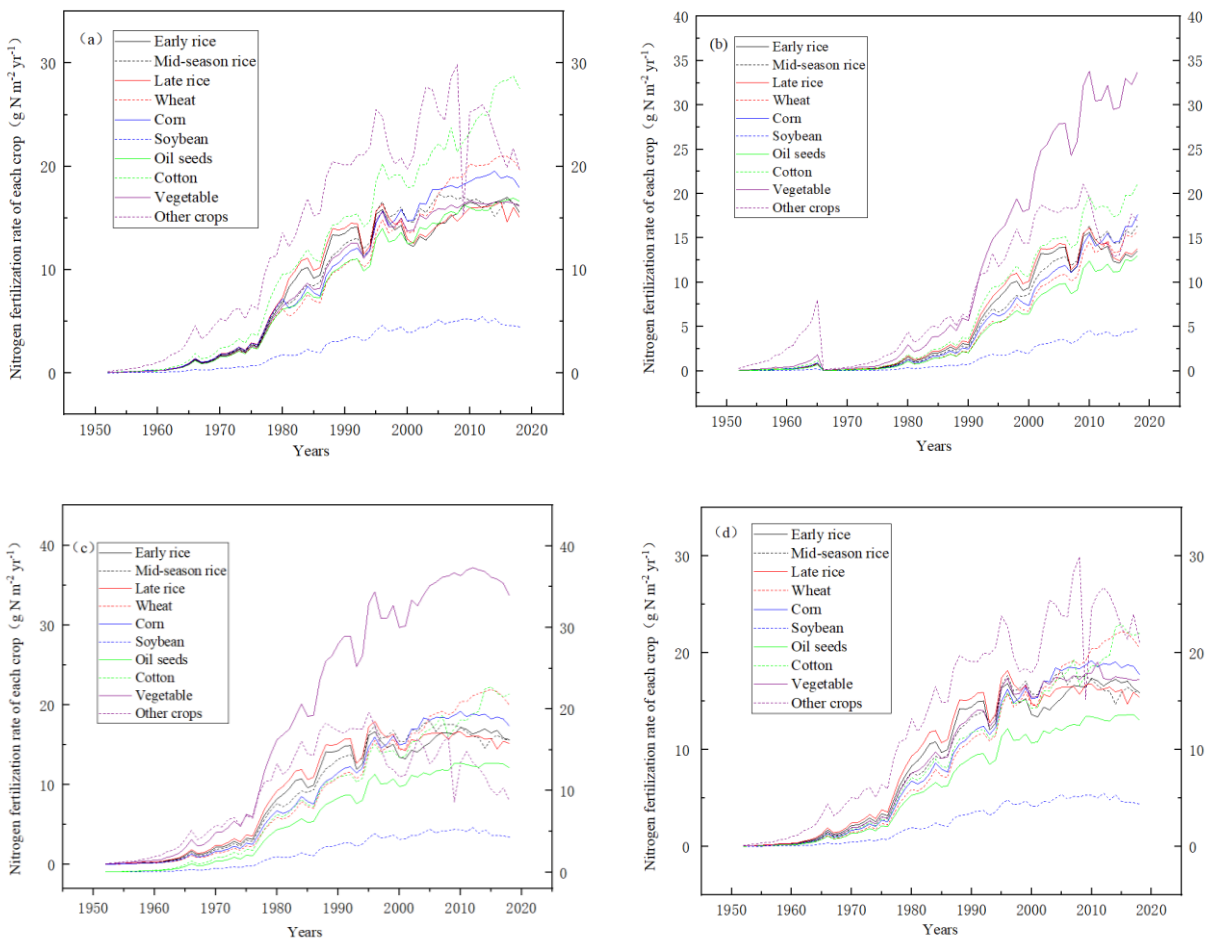

53 **Fig. S4** Supplementary information showing total nitrogen fertilizers input for each major crop  
 54 types from 1952 to 2018 using data of nearby provinces for gap-filling. (panel a: N fertilizers use  
 55 rates of vegetable is the average of all other crops (except ‘Other crops’), and compound  
 56 fertilizer contains 16% of N; panel b: N fertilizer rate of vegetable is the average of all other  
 57 crops (except ‘Other crops’), and compound fertilizer contains 33% of N; panel c: N fertilizer  
 58 rate of vegetable is 3.3 times of the average rate of all other crops (except ‘Other crops’), and  
 59 compound fertilizer contains 16% of N; panel b: N fertilizers use rates of vegetable is 3.3 times  
 60 of the average rate of all other crops (except ‘Other crops’), and compound fertilizer contains  
 61 33% of N; Unit: Tg N yr<sup>-1</sup>)

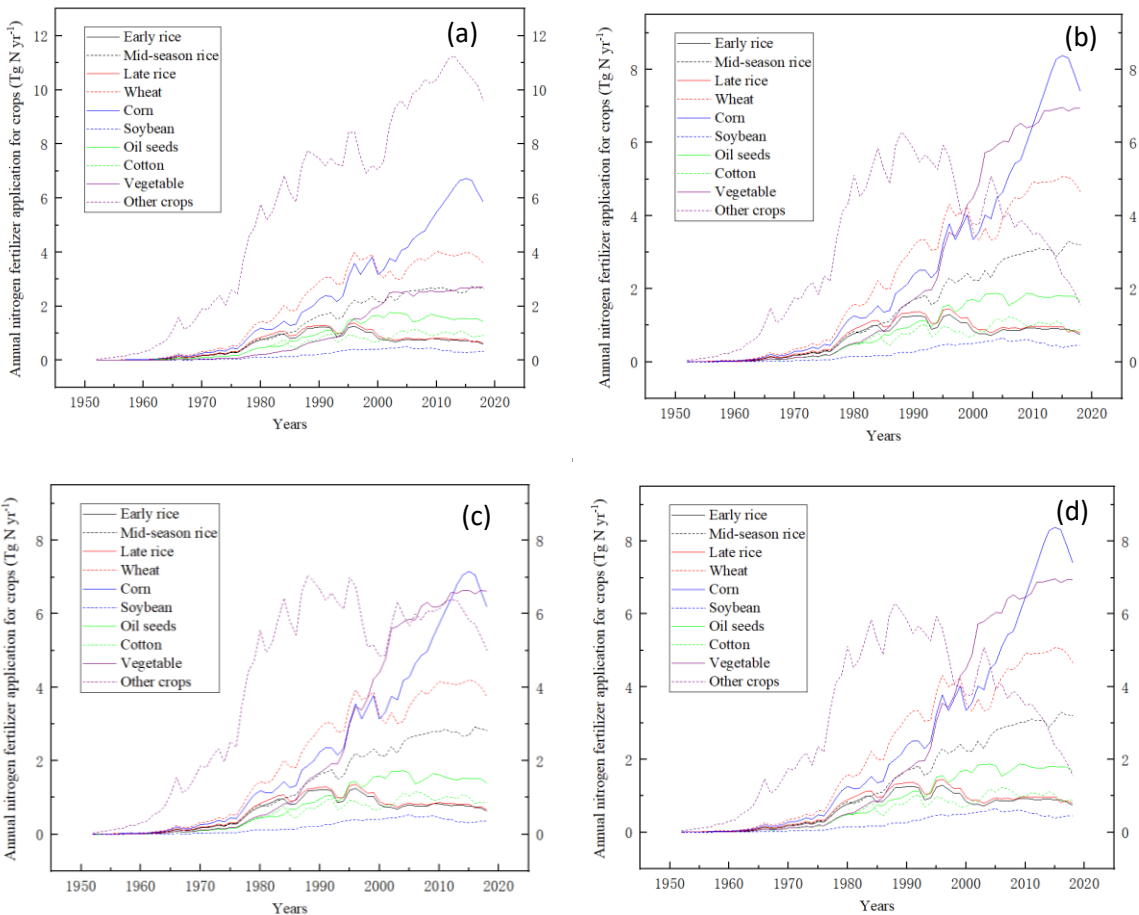

62

63  
64

65 **Fig. S5** Supplementary information showing total nitrogen fertilizers input for each major crop  
 66 types from 1952 to 2018 using data of national averages for gap-filling. (panel a: N fertilizer rate  
 67 of vegetable is the average of all other crops (except ‘Other crops’), and compound fertilizer  
 68 contains 16% of N; panel b: N fertilizers use rates of vegetable is the average of all other crops  
 69 (except ‘Other crops’), and compound fertilizer contains 33% of N; panel c: N fertilizer use rates  
 70 of vegetable is 3.3 times of the average rate of all other crops (except ‘Other crops’), and  
 71 compound fertilizer contains 16% of N; panel b: N fertilizers use rates of vegetable is 3.3 times  
 72 of the average rate of all other crops (except ‘Other crops’), and compound fertilizer contains  
 73 33% of N; Unit: Tg N yr<sup>-1</sup>)

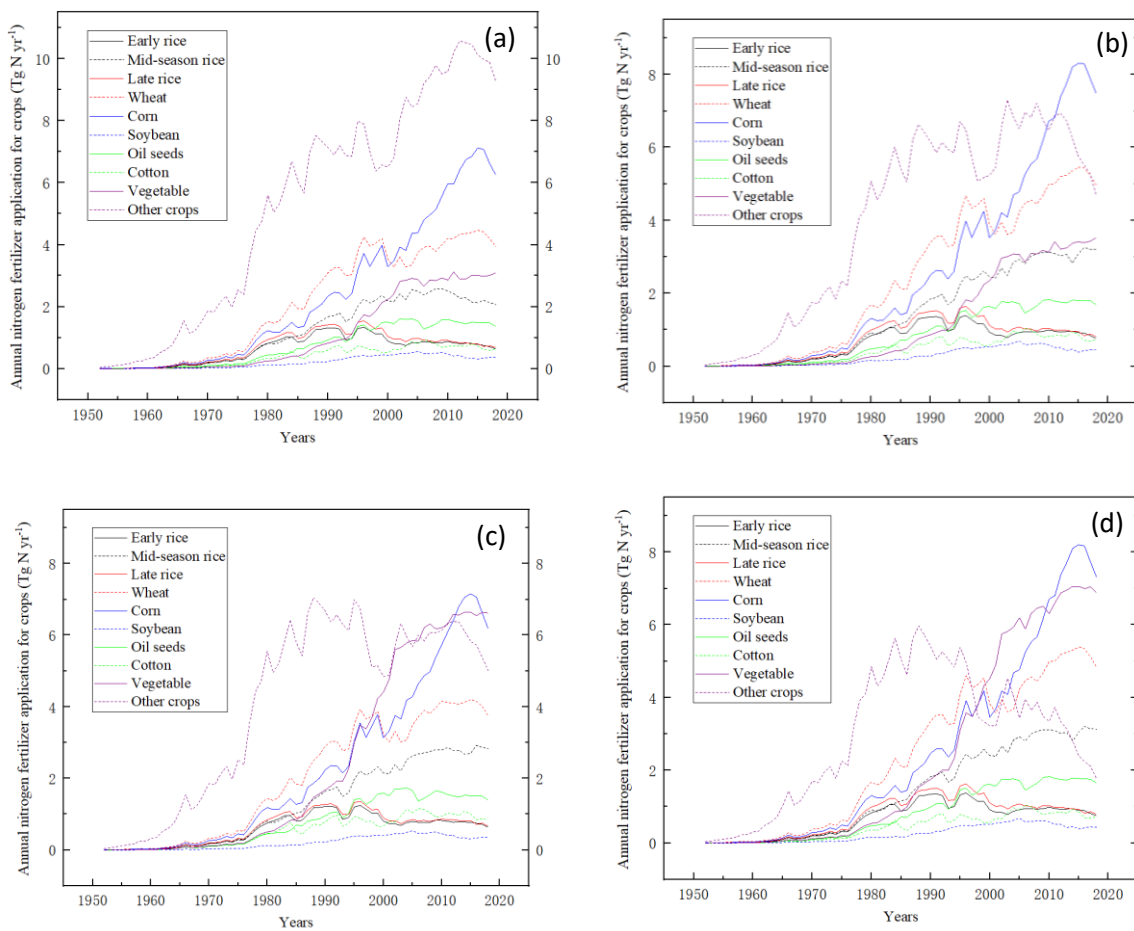

Supplement: Supplementary file 1 [file essd-2022-263-supplement.pdf]
